# Supplementary material for: Long aliphatic chain coated rare-earth nanocrystal as polymer-based optical waveguide amplifiers
Source: Royal Society of Chemistry journal article supplement (doi:10.1039/c0jm00706d), 2010-01-01
Supplement: c0jm00706d.pdf [file c0jm00706d.pdf]

## **Supplementary information:**

### **Long Aliphatic Chain Coated Rare-earth Nanocrystal as Polymer-Based Optical Waveguide Amplifiers**

**Ka-Long Lei<sup>a</sup>, Cheuk-Fai Chow<sup>ab</sup>, Kwok-Chu Tsang<sup>c</sup>, Elva  
N. Y. Lei<sup>b</sup>, V.A.L. Roy<sup>\*a</sup>, Michael H. W. Lam<sup>b</sup>, C. S. Lee<sup>a</sup>, E.  
Y. B. Pun<sup>c</sup>**

<sup>a</sup> *Department of Physics and Materials Science, City University of Hong Kong, 83 Tat Chee Ave., H.K. SAR, China. Fax: (+852) 27887406; Tel: (+852) 21942729; E-mail: val.roy@cityu.edu.hk*

<sup>b</sup> *Department of Biology & Chemistry, City University of Hong Kong, 83 Tat Chee Ave., H.K. SAR, China.*

<sup>c</sup> *Department of Electronic Engineering, City University of Hong Kong, 83 Tat Chee Ave., Hong Kong SAR, China.*

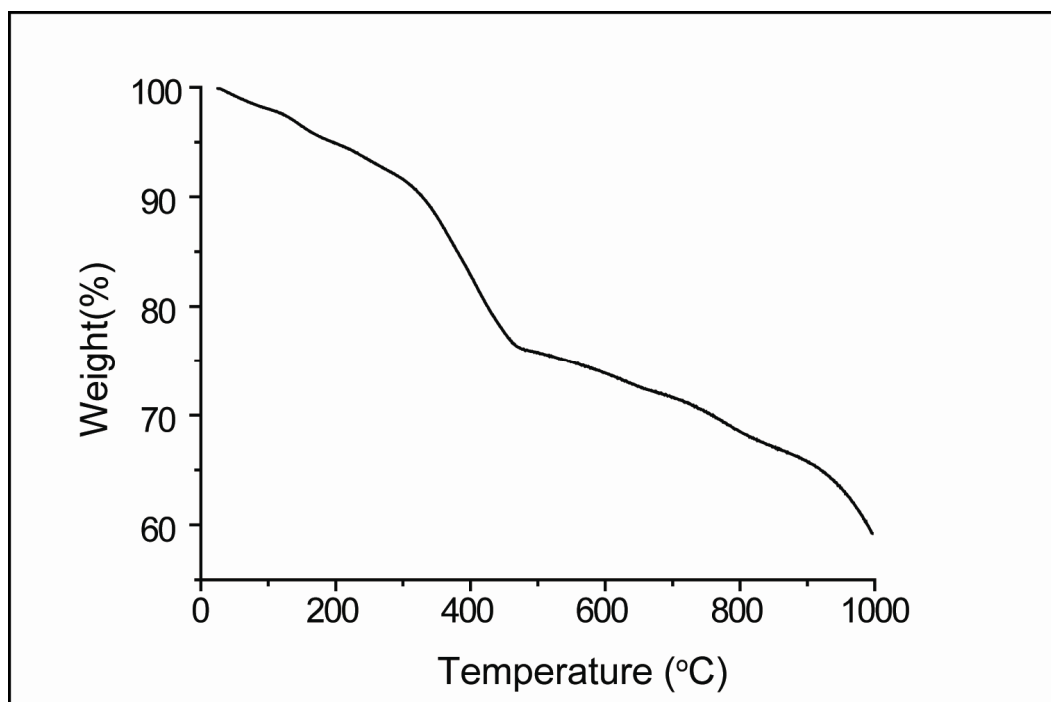

**S. Figure 1.** TGA curve of the oleic acid coated  $\text{NaY}_{78\%}\text{F}_4:\text{Yb}_{20\%}\text{Er}_{2\%}$  nanocrystals.

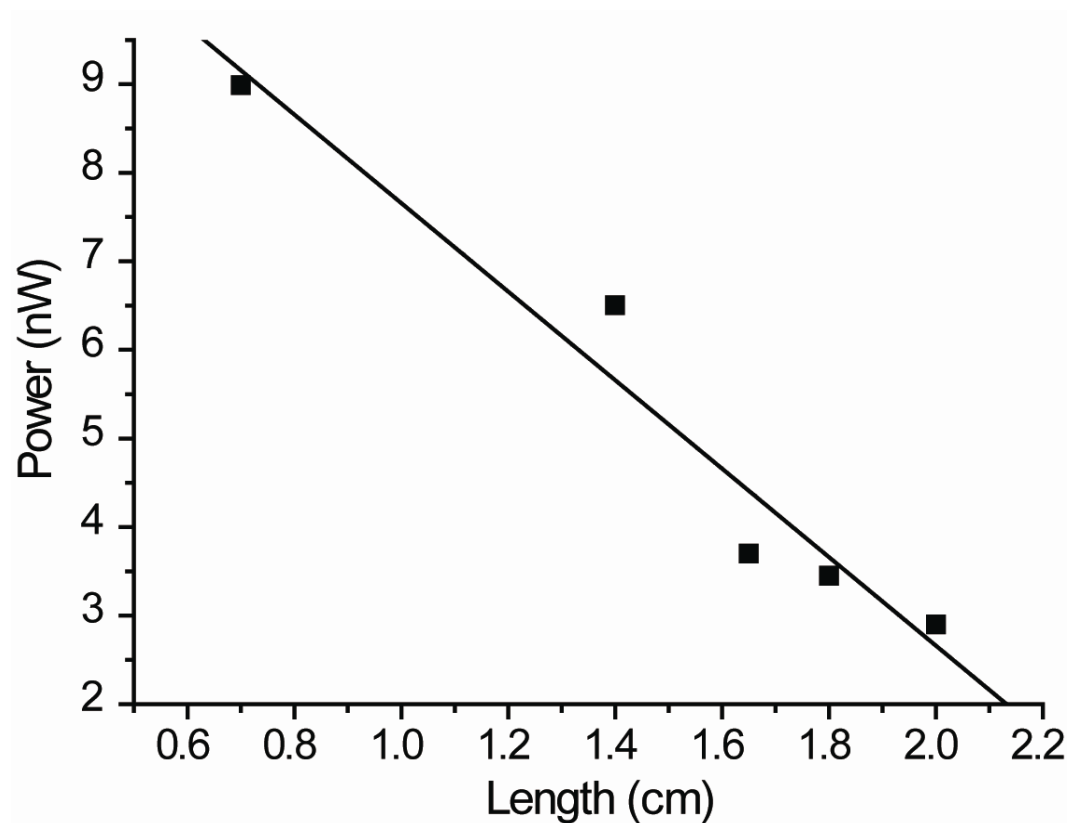

**S. Figure 2.** Propagation loss of the nanocubes doped waveguide measured in 1535 nm. Note that the propagation loss was found to be  $\sim 3.4$  dB/cm at 1535nm wavelength. The propagation loss is calculated from the linear plot as  $[1/(L_1 - L_0)] \times [10 \log (P_0/P_1)]$  dB, where  $L$  is the length of the waveguide;  $P$  is the signal power.

***S. Table 1*** – Refractive index measurement

|                                    | 1535nm | 633nm | 473nm |
|------------------------------------|--------|-------|-------|
| Undoped KMPR                       | 1.548  | 1.566 | 1.583 |
| 0.1 wt% the nanocrystal doped KMPR | 1.548  | 1.566 | 1.583 |
